# Supplementary material for: Nanoparticle-Enabled Combination Therapy Showed Superior Activity against Multi-Drug Resistant Bacterial Pathogens in Comparison to Free Drugs
Source: MDPI journal article supplement (doi:10.3390/nano12132179), 2022-06-24
Supplement: s1 [file s1]

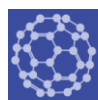

## Supplementary Material

# Nanoparticle-Enabled Combination Therapy Showed Superior Activity against Multi-Drug Resistant Bacterial Pathogens in Comparison to Free Drugs

Amarpreet Brar <sup>1,2</sup>, Satwik Majumder <sup>1,2</sup>, Maria Zardon Navarro <sup>2,3</sup>, Marie-Odile Benoit-Biancamano <sup>2,3</sup>, Jennifer Ronholm <sup>1,4</sup> and Saji George <sup>1,2,\*</sup>

<sup>1</sup> Department of Food Science and Agricultural Chemistry, Macdonald Campus, McGill University, 2111 Lakeshore, Ste Anne de Bellevue, QC H9X 3V9, Canada, amarpreet.brar@mail.mcgill.ca (A.B.); satwik.majumder@mail.mcgill.ca (S.M.); jennifer.ronholm@mcgill.ca (J.R.)

<sup>2</sup> Swine and Poultry Infectious Diseases Research Center (CRIPA), Faculté de Médecine Vétérinaire, Université de Montréal, 3200 Sicotte, Saint-Hyacinthe, QC J2S 2M2, Canada, maria.zardon@umontreal.ca (M.Z.N.); marie-odile.benoit-biancamano@umontreal.ca (M.-O.B.-B.)

<sup>3</sup> Research Group on Infectious Diseases in Production Animals (GREMIP), Department of Pathology and Microbiology, Faculté de médecine vétérinaire, Université de Montréal, 3200 Sicotte, Saint-Hyacinthe, QC, Canada

<sup>4</sup> Department of Animal Science, Macdonald Campus, McGill University, 2111 Lakeshore Ste Anne de Bellevue, QC H9X 3V9, Canada

\* Correspondence: saji.george@mcgill.ca; Tel: +514-398-7920; Fax: +514-398-7990

**Table S1.** Antibiotics and their corresponding concentrations in the disks used in the determination of antimicrobial susceptibility of tested isolates.

| Antibiotic          | Disk Content |
|---------------------|--------------|
| Apramycin (APR)     | 15 µg        |
| Ampicillin (AMP)    | 10 µg        |
| Amikacin (AK)       | 30 µg        |
| Bacitracin (B)      | 10 iu        |
| Cefotaxime (CTX)    | 30 µg        |
| Cefazolin (CZ)      | 30 µg        |
| Chloramphenicol (C) | 30 µg        |
| Ciprofloxacin (CIP) | 5 µg         |
| Colistin (CT)       | 10 µg        |
| Erythromycin (E)    | 15 µg        |
| Gentamycin (CN)     | 10 µg        |
| Kanamycin (K)       | 30 µg        |
| Lincomycin (MY)     | 2 µg         |
| Neomycin (N)        | 30 µg        |
| Ofloxacin (OFX)     | 5 µg         |
| Penicillin (P)      | 10 iu        |
| Streptomycin (SH)   | 100 µg       |
| Spectinomycin (S)   | 10 µg        |
| Tetracycline (TE)   | 30 µg        |
| Ticarcillin (TIC)   | 75 µg        |
| Tilmicosin (TIL)    | 15 µg        |
| Tobramycin (TOB)    | 10 µg        |
| Trimethoprim (SXT)  | 25 µg        |
| Vancomycin (VA)     | 30 µg        |

The antimicrobial susceptibility of the isolates was determined using the Kirby-Bauer disk diffusion assay [1]. Isolates were cultured overnight at 37 °C in MHB. The cells were maintained at McFarland 0.5, and 10 µL of the inoculum was spread onto MH agar plates using a spreader. The disks containing the antibiotics were then placed on the lawn of bacteria using forceps and the plates were incubated for 18 h at 37 °C. The diameter of the zone of inhibition was measured, and the isolates were categorized as resistant or susceptible according to CLSI guidelines [2].

### 1. Resazurin Assay

Resazurin was used to measure bacterial viability [3]. Briefly, 30 µL of 0.5% resazurin solution was added to each well, incubated for 2 h at 37 °C, and read at 530/590 (excitation/emission) nm using a plate reader. *S. aureus* ATCC 25923 and *E. coli* ATCC 25922 were used as quality control strains to compare the MICs.

### 2. Determination of Efflux Activity

Efflux activity of the isolates was measured as described previously [4]. Briefly, bacterial cells cultured overnight at 37 °C, were washed thrice in phosphate buffered saline (PBS) (1X) and adjusted to McFarland 1.0. Ethidium bromide (EtBr) (3 µg/mL) was added to the bacterial suspension. Subsequently, EPIs - 3 µg/mL carbonyl cyanide m-chlorophenyl hydrazone (CCCP) for *Salmonella* and 30 µg/mL chlorpromazine (CPZ) for *Staphylococcus* isolates were added to allow maximum intracellular accumulation of EtBr under shaking at 25 °C for 60 min. Cells were then resuspended in 1 mL of PBS and transferred to a 96-well plate. Glucose (0.4% v/v) was added to trigger the efflux of EtBr and fluorescence was measured continuously for 40 min at 37 °C using a plate reader at 530–590 nm (excitation/emission) (SpectraMax i3, Molecular Devices, San Jose, CA, USA). Time ( $T_{1/2}$ ) taken for the extrusion of half the amount of EtBr was measured.  $T_{1/2}$  of isolates was compared based on which the efflux activity was determined. *S. aureus* 10812464, originally isolated from a case of bovine mastitis and known to have efflux activity as seen in our previous studies, and *S. enterica* ser. Typhimurium SL1344 was used as a positive control.

Amongst *Salmonella* isolates, *S. enterica* ser. Dublin showed the highest efflux activity (extrusion of EtBr), followed by *S. enterica* ser. Choleraesuis and *S. enterica* ser. Typhimurium (Figure S1(A)), with  $T_{1/2}$  for EtBr extrusion as 241.56 s, 323.23 s, and 413.43 s respectively. Among *Staphylococcus* isolates, *S. aureus* M12 had the highest efflux activity, followed by *S. aureus* M17 and *S. hyicus* M43, with  $T_{1/2}$  for EtBr extrusion as 240.4 s, 448.5 s, and 885.3 s, respectively. No efflux activity was observed for *S. hyicus* M48 (Figure S1B).

### 3. Beta-Lactamase Assay

Bacterial isolates grown overnight were adjusted to McFarland 1.0. Ampicillin (50 µg/mL) was added to the cell suspension and incubated at 37 °C for 3 h. Cells were then centrifuged at  $9,000 \times g$  for 10 min and washed in sodium phosphate buffer (pH 7.0). Pelleted cells were resuspended in buffer, sonicated on ice for 3 min, and centrifuged at  $17,500 \times g$  for 25 min. The cell-free extract was used for Nitrocefin assay [3]. Nitrocefin (abcam, Canada) solution of 10 µL was mixed with 10 µL of the cell-free extract, and the final volume was adjusted to 100 µL in wells of a 96-well plate. The absorbance was detected in kinetic mode for 10 min at 390 nm using a plate reader. The enzyme activity was calculated using the formula:

$$\text{beta-lactamase enzyme activity} = \frac{S_a}{\text{Reaction time} \times S_v} \quad (1)$$

where  $S_a$  is the amount of nitrocefin (in µM) hydrolyzed in the unknown sample between  $t_1$  and  $t_2$  of the standard curve; reaction time is the time difference of  $t_1$  and  $t_2$ , and  $S_v$  is the sample volume (in mL). Beta-lactamase activity is reported as U/mL.

All the tested isolates, except *S. hyicus* M48 showed beta-lactamase activity (Figure S1C). The highest beta-lactamase activity was observed in *S. enterica* ser. Typhimurium (84.73 U/mL), followed by *S. enterica* ser. Choleraesuis (72.62 U/mL) and by *S. enterica* ser. Dublin (67.52 U/mL). The least beta-lactamase activity was observed in *S. aureus* M17 (52.12 U/mL).

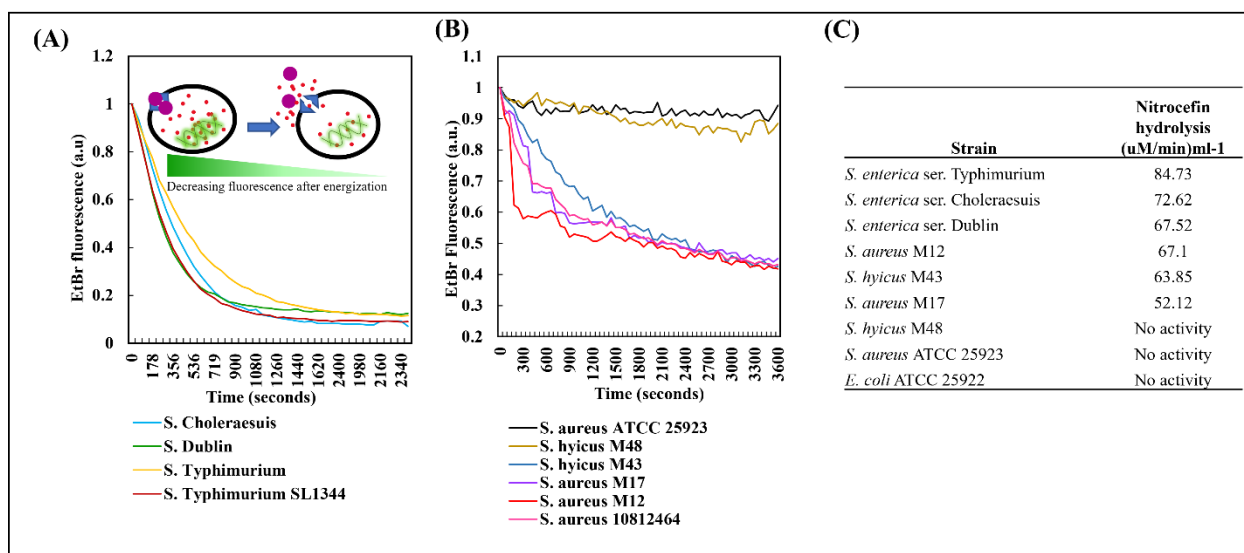

**Figure S1.** Efflux and beta-lactamase enzyme activity: Efflux pump activity in *Salmonella* (A) and *Staphylococcus* (B) isolates was assessed using EtBr as the substrate. Extrusion of EtBr was measured in kinetic mode by measuring the fluorescence at 530–590 nm (excitation/emission) after energizing the cells. (C) Tabular data showing beta-lactamase enzyme activity in *Staphylococcus* and *Salmonella* isolates.

#### 4. Biofilm Formation

The ability of the bacterial isolates to form a biofilm was determined using a crystal violet assay [5]. Briefly, bacterial cells were grown overnight at 37 °C under shaking. The cell suspensions (0.5 McFarland) of 200 µL were added to the wells of two 96-well plates. One plate was incubated for 24 h whereas, the other for 48 h. The wells were washed with saline 3× to remove any non-adherent cells and the adherent cells were fixed with 200 µL of 99% methanol. After 15 min, the methanol was removed, and the plates were air-dried. A 200 µL aliquot of crystal violet dye (0.2%) was added to the wells. After 40 min, the wells were washed, resuspended with 200 µL of acetic acid (33%), and absorbance was measured at 570 nm. The ability of bacterial isolates to form a biofilm was categorized as strong, moderate, weak, or no biofilm formation based on critical optical density ( $OD_c$ ) compared to the optical density of the sample ( $OD_s$ ).  $OD_c$  was calculated using the arithmetic mean of the absorbance of negative control and three times the addition of standard deviation. The biofilm-forming ability was categorized as no biofilm formation ( $OD_s < OD_c$ ), weak biofilm formation ( $OD_c < OD_s \leq 2OD_c$ ), moderate biofilm formation ( $2OD_c < OD_s \leq 4OD_c$ ), and strong biofilm formation ( $4OD_c < OD_s$ ).

The biofilm formation of bacterial isolates is compared in Figure S2. After 24 h, *S. enterica* ser. Choleraesuis, *S. enterica* ser. Dublin and *S. enterica* ser. Typhimurium SL1344 formed no biofilm while weak biofilm formation was observed for *S. aureus* M17, *S. hyicus* M48, and *S. enterica* ser. Typhimurium. *S. aureus* M12 and *S. hyicus* M43 formed moderate biofilm. After 48 h of incubation, *S. aureus* M12 and *S. hyicus* M43 formed stronger biofilm while there was no change in biofilm-forming ability for *S. hyicus* M48 and *S. enterica* ser. Typhimurium even after 48 h. *S. aureus* M17 formed weak biofilm, while no biofilm formation was observed in *S. enterica* ser. Choleraesuis and *S. enterica* ser. Dublin even after 48 h.

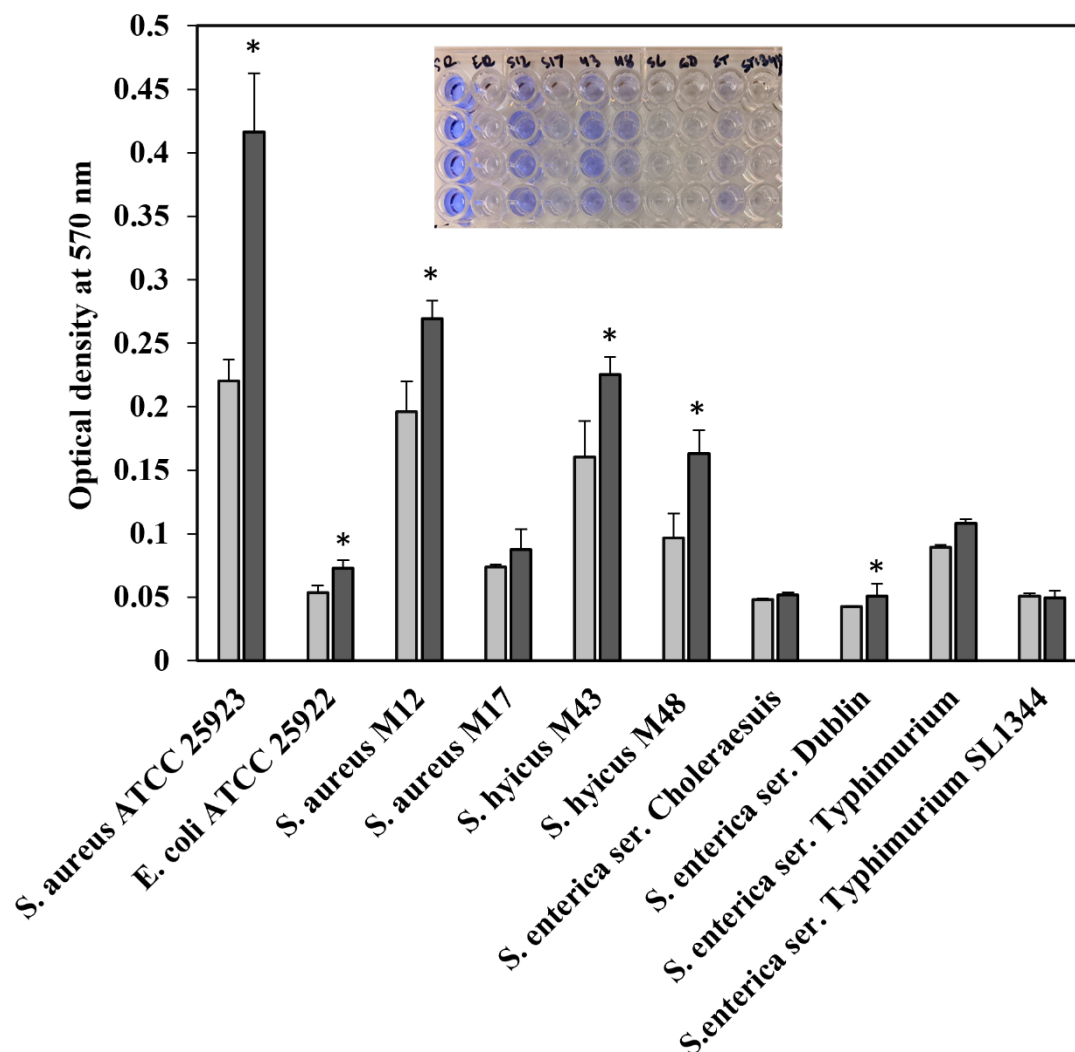

**Figure S2.** Biofilm formation assay: Biofilm formation of *Staphylococcus* and *Salmonella* isolates from animal farms measured using crystal violet assay after 24 h (light grey) and 48 h (dark grey). Inlet shows the image of one of the plates used for biofilm assay. A significant difference in biofilm formation ability ( $p < 0.05$ ) is marked as '\*'.

### 5. Hemolysis of Blood Agar Plates

Bacterial isolates were tested for the manifestation of hemolysins as detailed previously [6]. Briefly, bacterial isolates were grown overnight in MHB and streaked onto blood agar plates (TSA with 5% defibrinated sheep blood). The plates were incubated at 37 °C for 24 h. The pattern of hemolysis was detected by visual inspection for the translucency around the bacterial colony.

Results of hemolysis are summarized in tabular data Figure S3A. A clear zone of hemolysis (beta-hemolysis) was observed in *S. aureus* M12 (Figure S3B), *S. aureus* M17, *S. hyicus* M43 while partial hemolysis or green discoloration (alpha-hemolysis) was observed in *S. hyicus* M48. *Salmonella* isolates showed green discoloration (Figure S3B) around the bacterial colonies, and thus categorized as hemolysin-producing isolates.

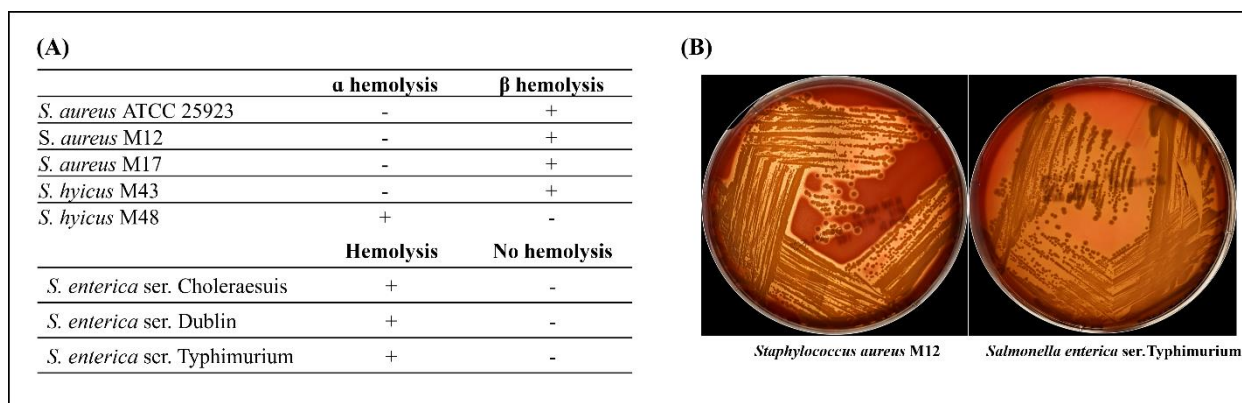

**Figure S3.** Hemolysis assay: Bacterial isolates were streaked onto tryptic soy agar plates containing 5% defibrinated sheep blood and incubated overnight. Hemolysis activity was assessed based on characteristic translucency around bacterial colonies. **(A)** Tabular data summarizing the type of hemolysis activity in tested isolates. **(B)** *S. aureus* M12 produced translucent halo around the cultured colonies – beta-hemolysis, *S. enterica* ser. Typhimurium showed hemolysis (green discoloration).

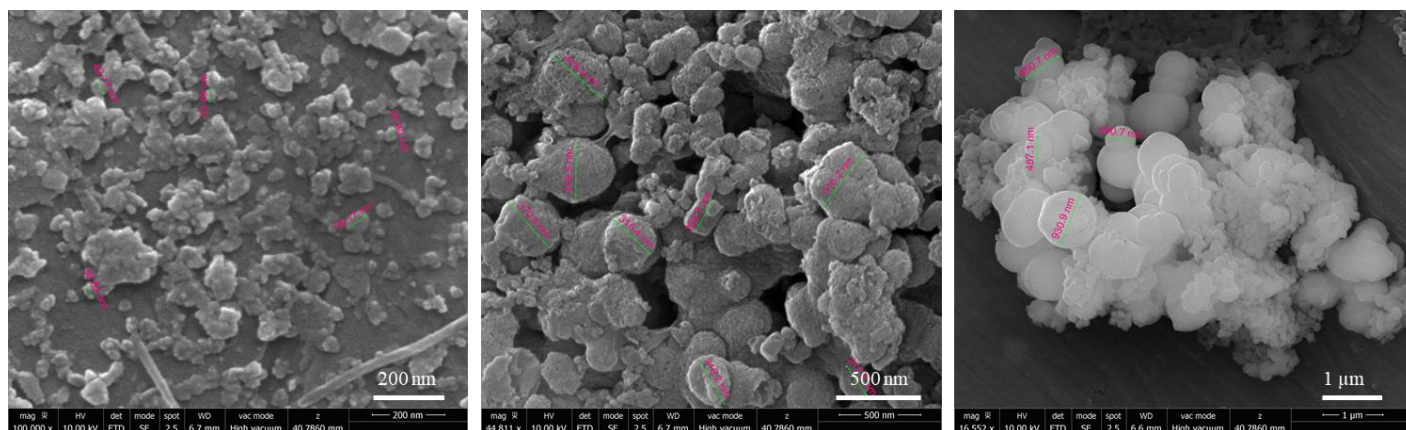

**Figure S4.** SEM images of Ch-TET NPs, Si-CPZ NPs, and CMD with marked dimensions.

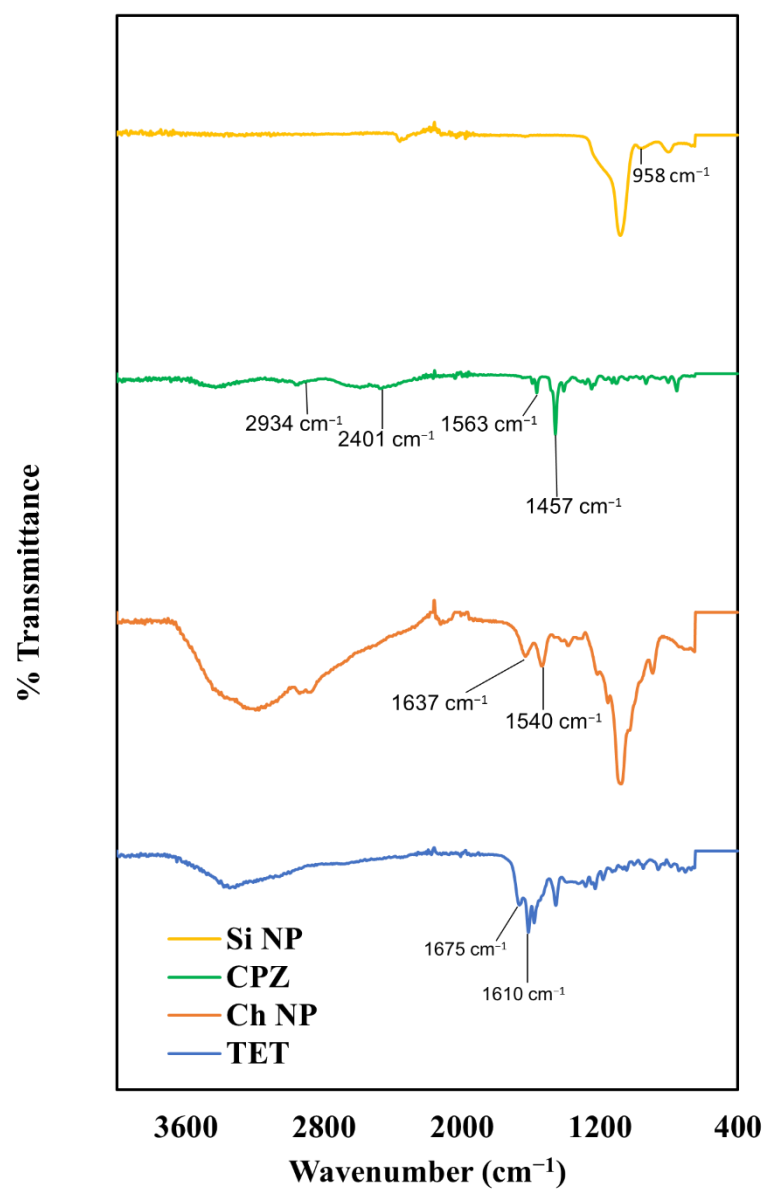

Figure S5. FTIR spectra of Si NP, CPZ, Ch NP, and TET.

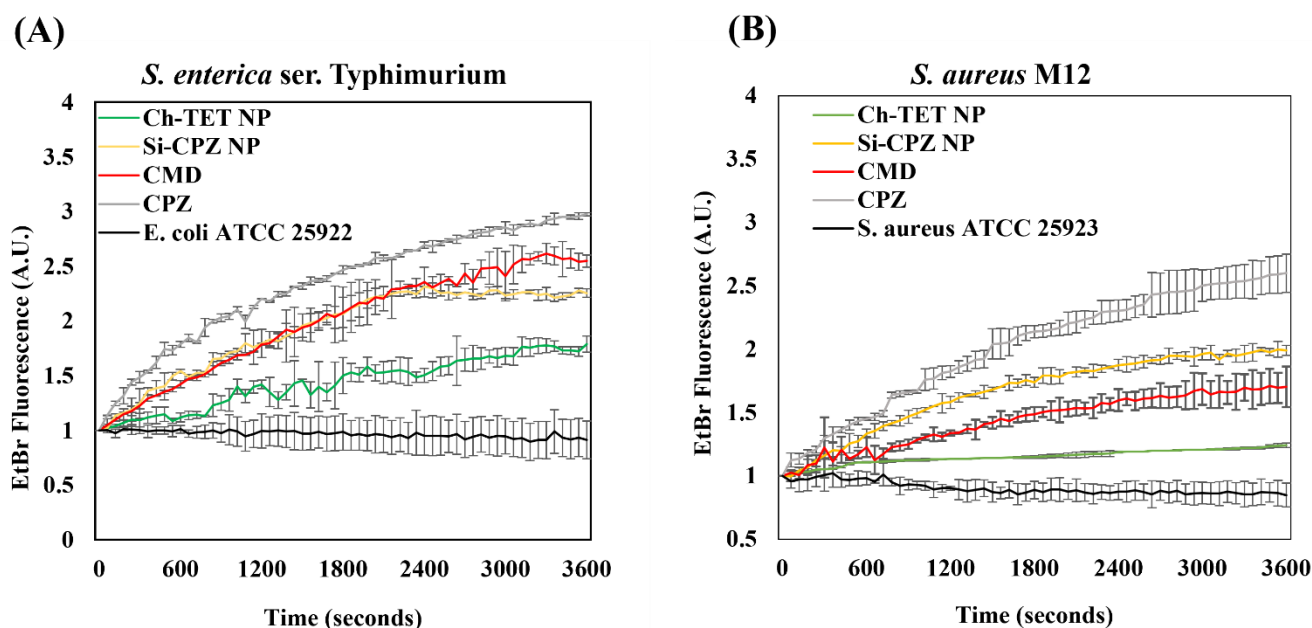

**Figure S6.** EtBr accumulation in bacterial cells. Accumulation of EtBr in *S. enterica* ser. Typhimurium (A) and *S. aureus* M12 (B) treated with synthesized nanoparticles determined by measuring fluorescence (530/590) nm.

## 6. EtBr Accumulation Assay

It was observed that in *S. enterica* ser. Typhimurium, EtBr accumulation was fastest when treated with Si-CPZ NP with  $t_2^1$  of 1398 s. The CMD also led to fast accumulation of EtBr with  $t_2^1$  of 1771 s. Ch-TET NP treated cells showed very slow accumulation with  $t_2^1$  of >3600 s. *S. enterica* ser. Typhimurium treated with CPZ was used as a positive control. In case of *S. aureus* M12, Si-CPZ NP treated bacterial cells showed fastest accumulation of EtBr ( $t_2^1$  of 1793 s). CMD also successfully led to accumulation of EtBr ( $t_2^1$  of 2176 s). Extremely slow accumulation of EtBr was observed for bacterial cells treated with Ch-TET NP ( $t_2^1$  >3600 s). *S. aureus* M12 treated with CPZ was used as positive control.



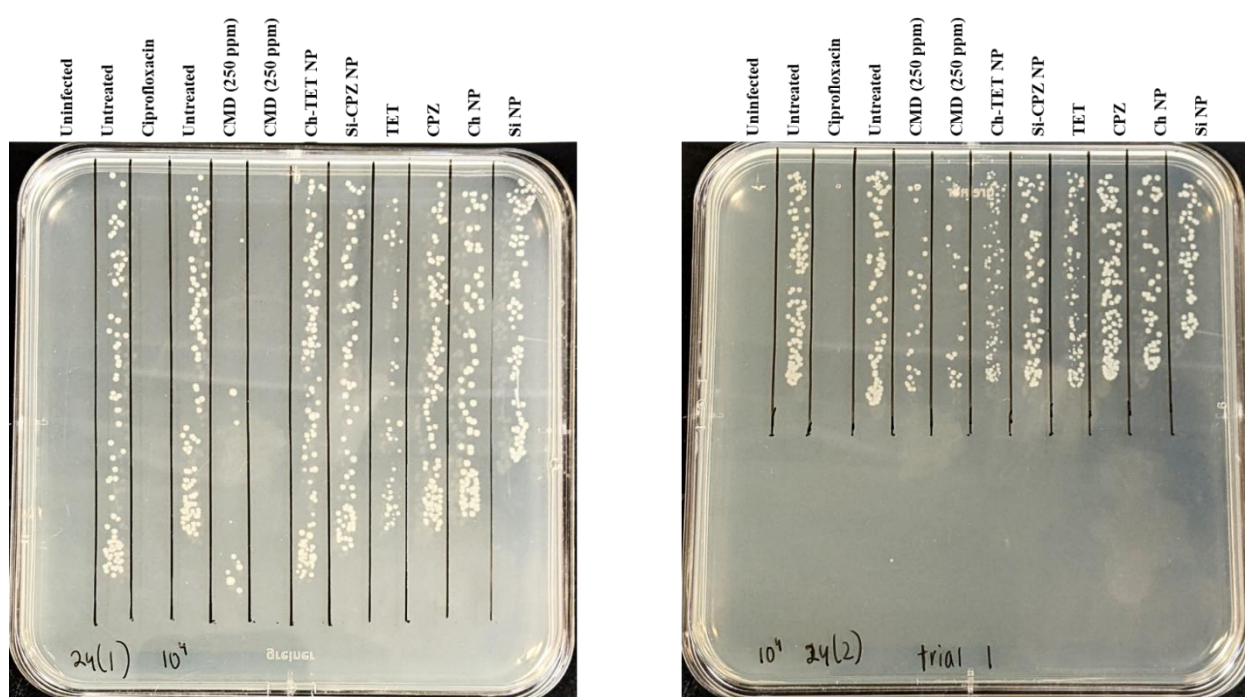

**Figure S7.** Determination of CFU/mL. Image of plates used to determine CFU/mL of lysates of infected Caco-2 cells treated with nanoparticle sample

## References

1. Hudzicki, J. *Kirby-Bauer Disk Diffusion Susceptibility Test Protocol*. American Society for Microbiology 2009. <https://asm.org/getattachment/2594ce26-bd44-47f6-8287-0657aa9185ad/Kirby-Bauer-Disk-DiffusionSusceptibility-Test-Protocol-pdf.pdf> (accessed on 14 March 2021).
2. Clinical Laboratory Standards Institute. *Performance Standards for Antimicrobial Susceptibility Testing*; 2021. <https://clsi.org/standards/products/microbiology/documents/m02/> (Accessed on 24 October 2020).
3. Majumder, S.; Jung, D.; Ronholm, J.; George, S. Prevalence and mechanisms of antibiotic resistance in *Escherichia coli* isolated from mastitic dairy cattle in Canada. *BMC Microbiol.* **2021**, *21*, 222.
4. Paixão, L.; Rodrigues, L.; Couto, I.; Martins, M.; Fernandes, P.; de Carvalho, C.C.R.; Monteiro, G.A.; Sansonetty, F.; Amaral, L.; Viveiros, M. Fluorometric determination of ethidium bromide efflux kinetics in *Escherichia coli*. *J. Biol. Eng.* **2009**, *3*, 18. <https://doi.org/10.1186/1754-1611-3-18>.
5. Xu, Z.; Liang, Y.; Lin, S.; Chen, D.; Li, B.; Li, L.; Deng, Y. Crystal violet and XTT assays on *Staphylococcus aureus* biofilm quantification. *Current microbiology* **2016**, *73*, 474–482.
6. Buxton, R. Blood agar plates and hemolysis protocols. *American Society for Microbiology* **2005**, 1–9. <https://asm.org/Protocols/Blood-Agar-Plates-and-Hemolysis-Protocols#:~:text=Blood%20Agar%20Plates%20and%20Hemolysis%20Protocols,-Download%20the%20Protocol&text=Many%20species%20of%20bacteria%20produce,based%20on%20their%20hemolytic%20properties.> (Accessed on 20 February 2021).
